# Supplementary material
Source: Copernicus journal article supplement (doi:10.5194/egusphere-2026-2473)
Supplement: Supplementary file 1 [file SupportingInformation.pdf › SupportingInformation.pdf]

# Supporting information for: Non-Target Analysis of Atmospheric Organic Aerosols as a Tool to discriminate Anthropogenic Contribution in mixed air masses during the ACROSS campaign

Niklas Karbach<sup>1</sup>, Pauline Pouyes<sup>2, 3</sup>, Emilie Perraudin<sup>3</sup>, Eric Villenave<sup>3</sup>, Thorsten Hoffmann<sup>1</sup>

<sup>1</sup>Department of Chemistry, Johannes Gutenberg-University, Mainz, 55128, Germany  
<sup>2</sup>African Research Center on Air Quality and Climate, University Mohammed VI Polytechnic, Benguerir, 43150, Morocco  
<sup>3</sup>University of Bordeaux, EPOC UMR 5803 CNRS, CS50023, 33615 Pessac cedex, France

Correspondence to: Thorsten Hoffmann (hoffmant@uni-mainz.de)

Keywords: organic aerosol, source apportionment, LC-HRMS, non-target analysis, biogenic and anthropogenic markers

## Samples

During the ACROSS campaign, a total of 43 filter samples were collected on DIGITEL DA-80 filters in the PM2.5 mode. A flow of 30 m<sup>3</sup>/h was used for the sampling, and a field blank filter was analyzed once for every 5 sample filters. Table S1 shows the individual times when a filter has been started and the corresponding air volume that was sampled on the filter. The start time of the filter marks roughly the end time of the previous filter. Due to accidental evaporation to complete dryness during sample preparation, and the resulting inaccuracies in the measured intensities due to evaporation, a total of 6 filters have been excluded from the analysis (marked with italics).

**Table S1: Sample data; the end time of the filter is approximately the start time of the next filter. The filters written in italics were not included in the analysis, due to accidental evaporation to complete dryness during the sample preparation, which causes significant errors due to unpredictable compound losses.**

| Sample number | Start            | Volume [m <sup>3</sup> ] |
|---------------|------------------|--------------------------|
| <b>B0</b>     | 28.06.2022 19:55 |                          |
| <b>F0</b>     | 28.06.2022 19:57 | 215,2226                 |
| <b>F1</b>     | 29.06.2022 03:54 | 429,4174                 |
| <b>F2</b>     | 29.06.2022 19:59 | 215,2994                 |
| <b>F3</b>     | 30.06.2022 03:59 | 431,9203                 |
| <b>F4</b>     | 30.06.2022 20:02 | 237,4860                 |
| <b>B5</b>     | 01.07.2022 04:49 |                          |
| <b>F5</b>     | 01.07.2022 04:49 | 408,4826                 |
| <b>F6</b>     | 01.07.2022 20:02 | 216,8882                 |

|            |                  |          |
|------------|------------------|----------|
| <b>F7</b>  | 02.07.2022 04:00 | 427,3889 |
| <b>F8</b>  | 02.07.2022 20:00 | 234,2829 |
| <b>F9</b>  | 03.07.2022 04:40 | 408,3101 |
| <b>B10</b> | 03.07.2022 20:00 |          |
| <b>F10</b> | 03.07.2022 20:00 | 215,8609 |
| <b>F11</b> | 04.07.2022 04:00 | 427,6845 |
| <b>F12</b> | 04.07.2022 20:00 | 230,4117 |
| <b>F13</b> | 05.07.2022 04:32 | 430,9396 |
| <b>F14</b> | 05.07.2022 20:40 | 195,8160 |
| <b>B15</b> | 06.07.2022 03:56 |          |
| <b>F15</b> | 06.07.2022 03:56 | 428,3118 |
| <b>F16</b> | 06.07.2022 19:57 | 221,4601 |
| <b>F17</b> | 07.07.2022 04:10 | 427,6950 |
| <b>F18</b> | 07.07.2022 20:00 | 215,2887 |
| <b>F19</b> | 08.07.2022 04:02 | 426,0405 |
| <b>B20</b> | 08.07.2022 19:57 |          |
| <b>F20</b> | 08.07.2022 19:57 | 222,0232 |
| <b>F21</b> | 09.07.2022 04:13 | 418,2270 |
| <b>F22</b> | 09.07.2022 19:53 | 216,7196 |
| <b>F23</b> | 10.07.2022 03:57 | 448,1481 |
| <b>F24</b> | 10.07.2022 20:43 | 215,5190 |
| <b>B25</b> | 11.07.2022 04:45 |          |
| <b>F25</b> | 11.07.2022 04:45 | 403,5786 |
| <b>F26</b> | 11.07.2022 19:58 | 211,6421 |
| <b>F27</b> | 12.07.2022 03:59 | 422,5218 |
| <b>F28</b> | 12.07.2022 19:55 | 230,7205 |
| <b>F29</b> | 13.07.2022 04:34 | 404,3321 |
| <b>B30</b> | 13.07.2022 19:56 |          |
| <b>F30</b> | 13.07.2022 19:56 | 214,2907 |
| <b>F31</b> | 14.07.2022 03:58 | 423,7196 |
| <b>F32</b> | 14.07.2022 19:57 | 225,8439 |
| <b>F33</b> | 15.07.2022 04:20 | 411,0481 |
| <b>F34</b> | 15.07.2022 19:54 | 216,0511 |

|                   |                         |                 |
|-------------------|-------------------------|-----------------|
| <b>B35</b>        | 16.07.2022 03:57        |                 |
| <b>F35</b>        | 16.07.2022 03:57        | 424,8961        |
| <b>F36</b>        | 16.07.2022 19:57        | 228,1549        |
| <b>F37</b>        | 17.07.2022 04:28        | 416,3306        |
| <b>F38</b>        | 17.07.2022 20:05        | 211,5281        |
| <b>F39</b>        | 18.07.2022 03:59        | 421,7912        |
| <b>B40</b>        | 18.07.2022 20:03        |                 |
| <i><b>F40</b></i> | <i>18.07.2022 20:03</i> | <i>226,4662</i> |
| <b>F41</b>        | 19.07.2022 04:40        | 397,2709        |
| <b>F42</b>        | 19.07.2022 20:03        | 212,7173        |

## Backwards trajectories

25 The following chapter contains the backwards trajectories as calculated with HYSPLIT. Each back-trajectory is started 24h before the sampling procedure for the specific filter was started. For more information see the manuscript.

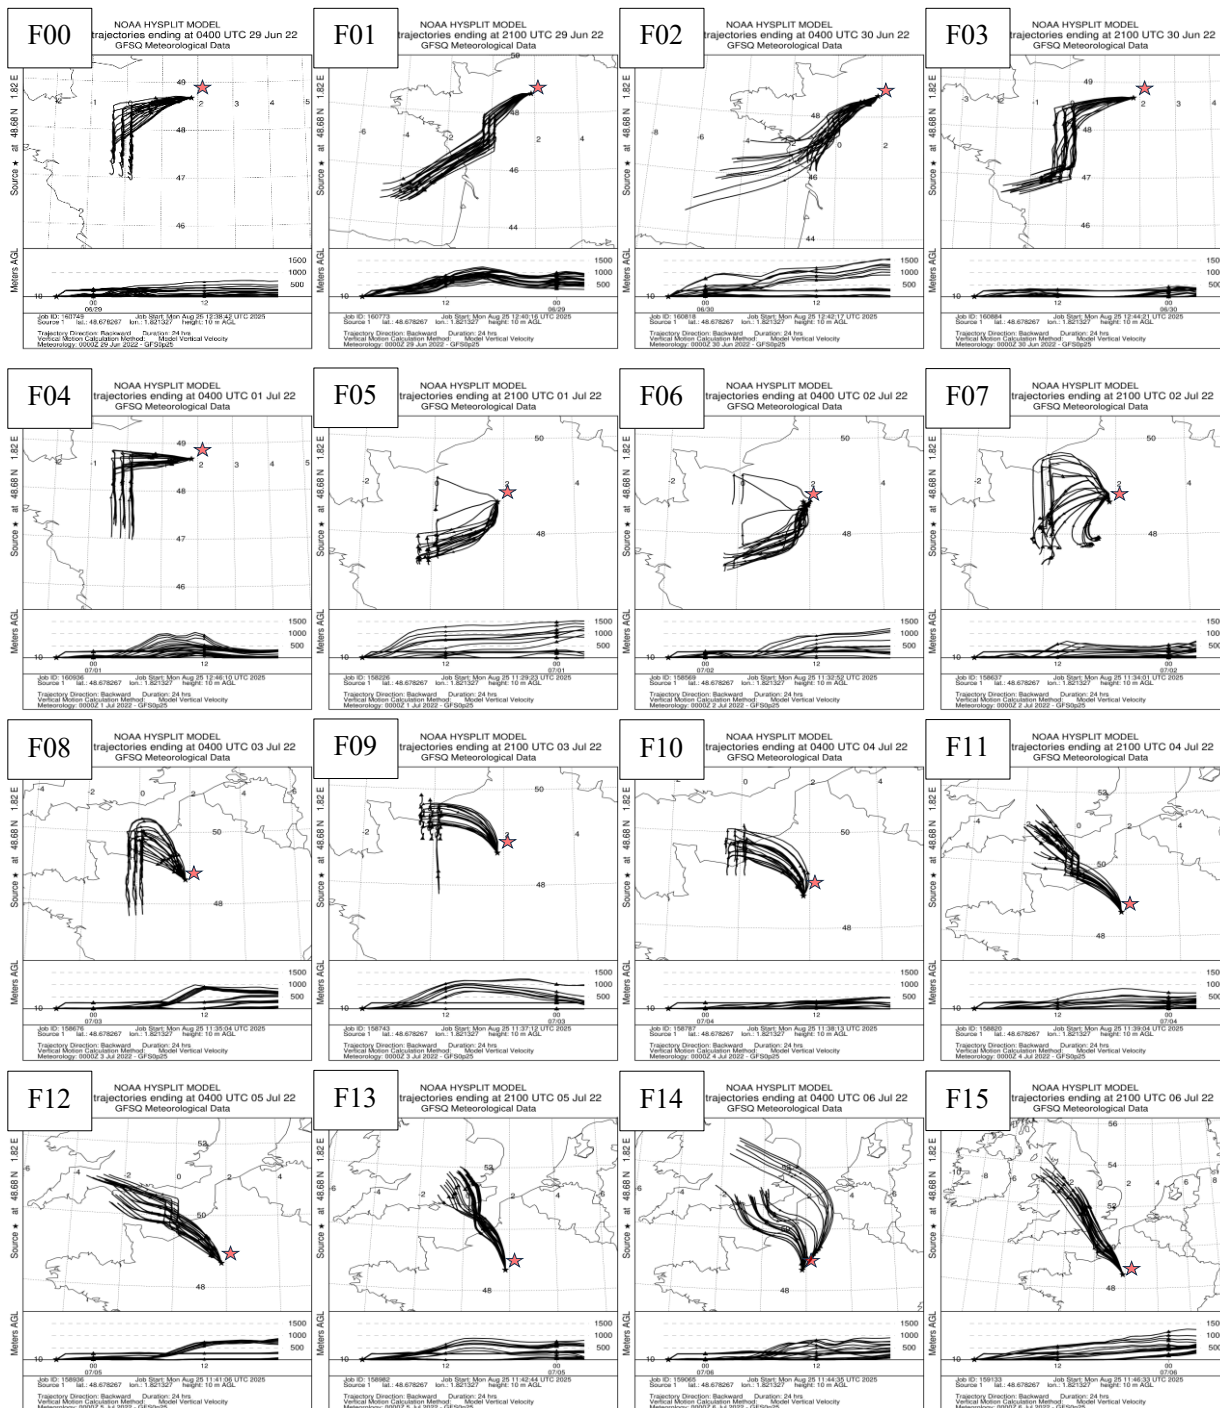



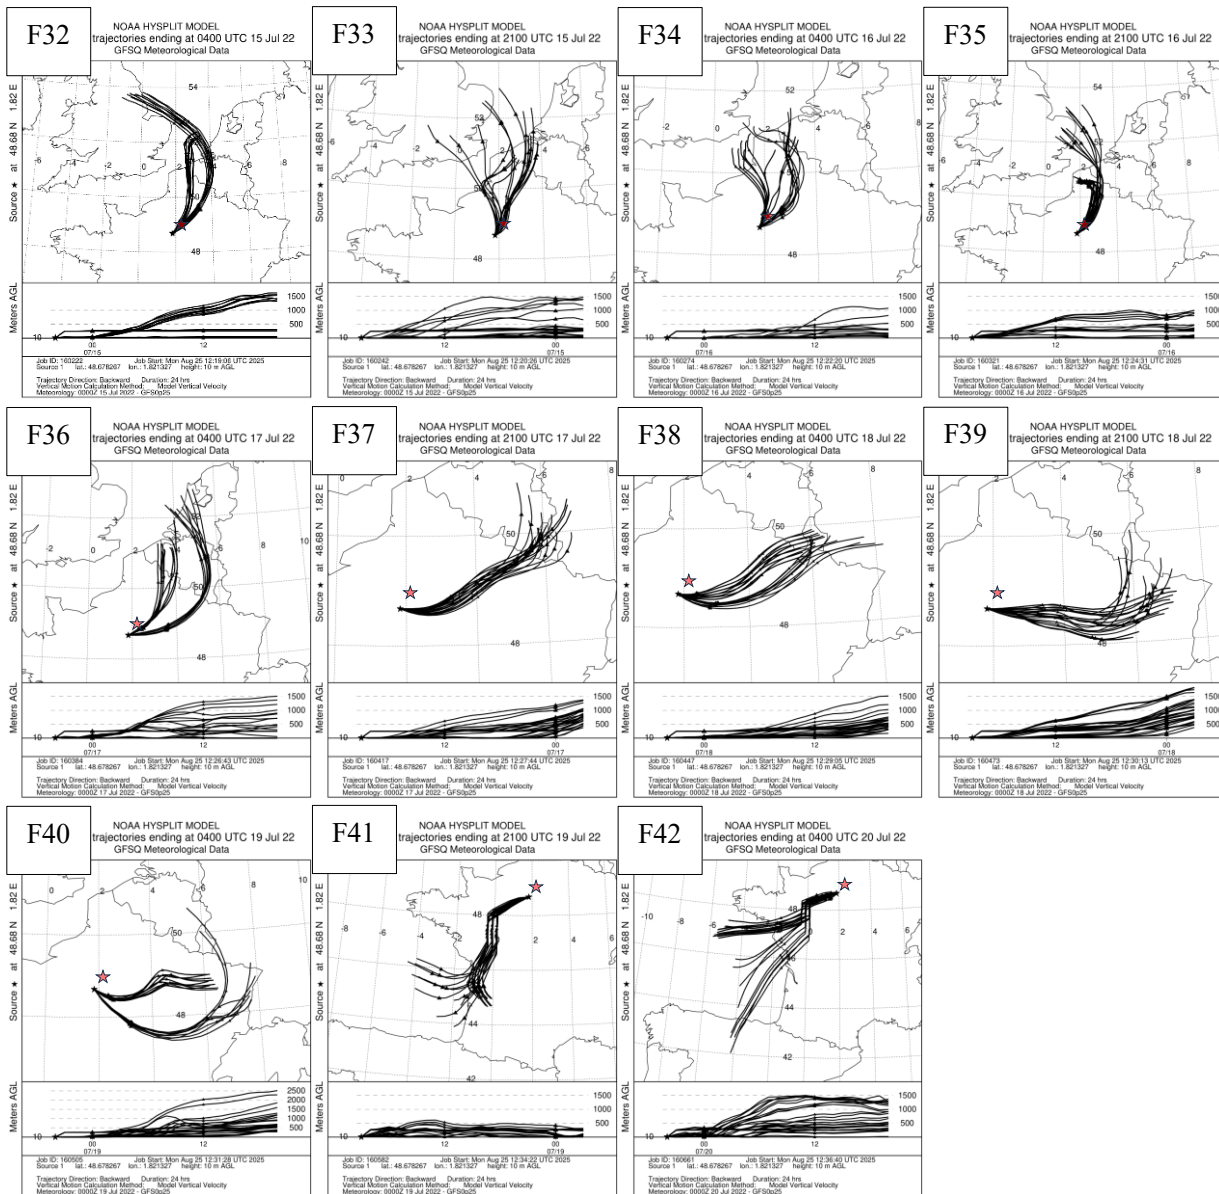

## Clustering results with samples S6, S21, S22, and S38 removed

35 An additional “testing” clustering run has been performed, where samples S6, S21, S22, and S38 have been removed from the training data. The clustering was performed in the same manner as the clustering described in the manuscript. The clustering results show striking similarity to the original clustering results where all available samples have been used. The accumulation of compounds in the individual clusters, as well as the general “look to the eye” of the Van Krevelen plots of both clustering runs is the same (see Figure S1). The bootstrap results shown in Figure 2 still show good stability for the anthropogenic cluster, despite having used fewer samples than in the original clustering run.

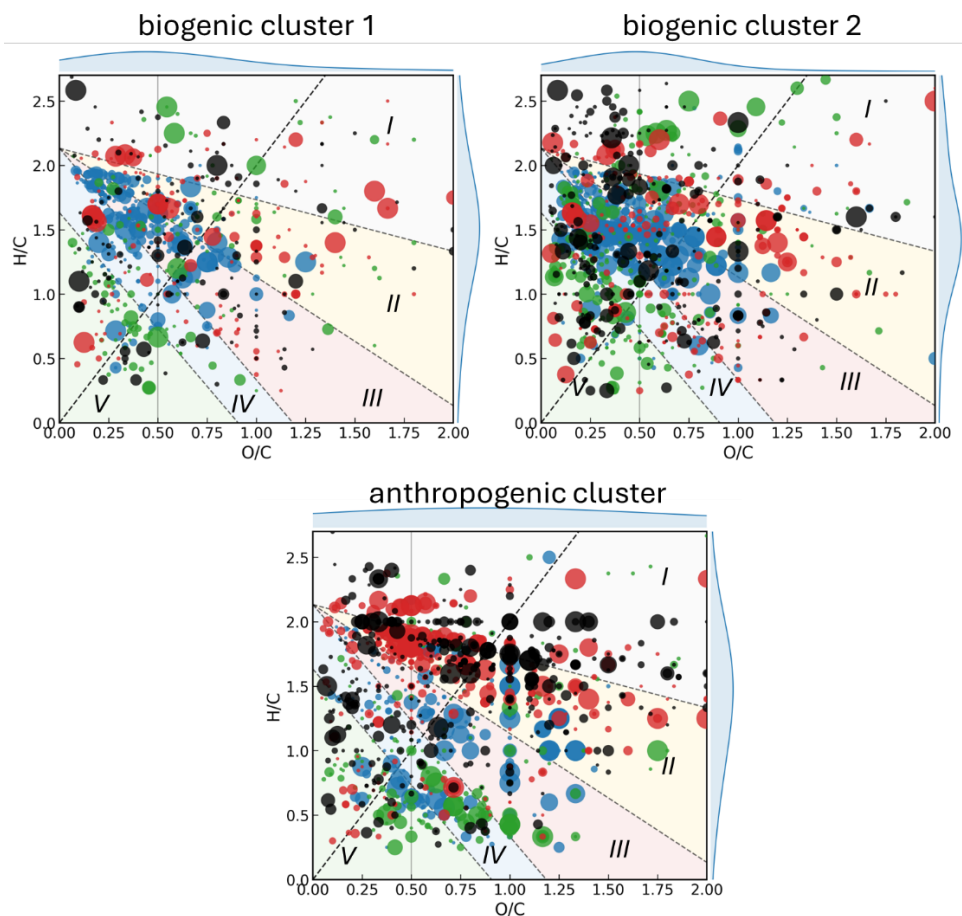

40 **Figure S1: Van Krevelen plots of the three individual clusters that were obtained during the testing clustering run. Upon comparison with the clustering performed in the manuscript, striking similarities of the individual clusters can be seen.**

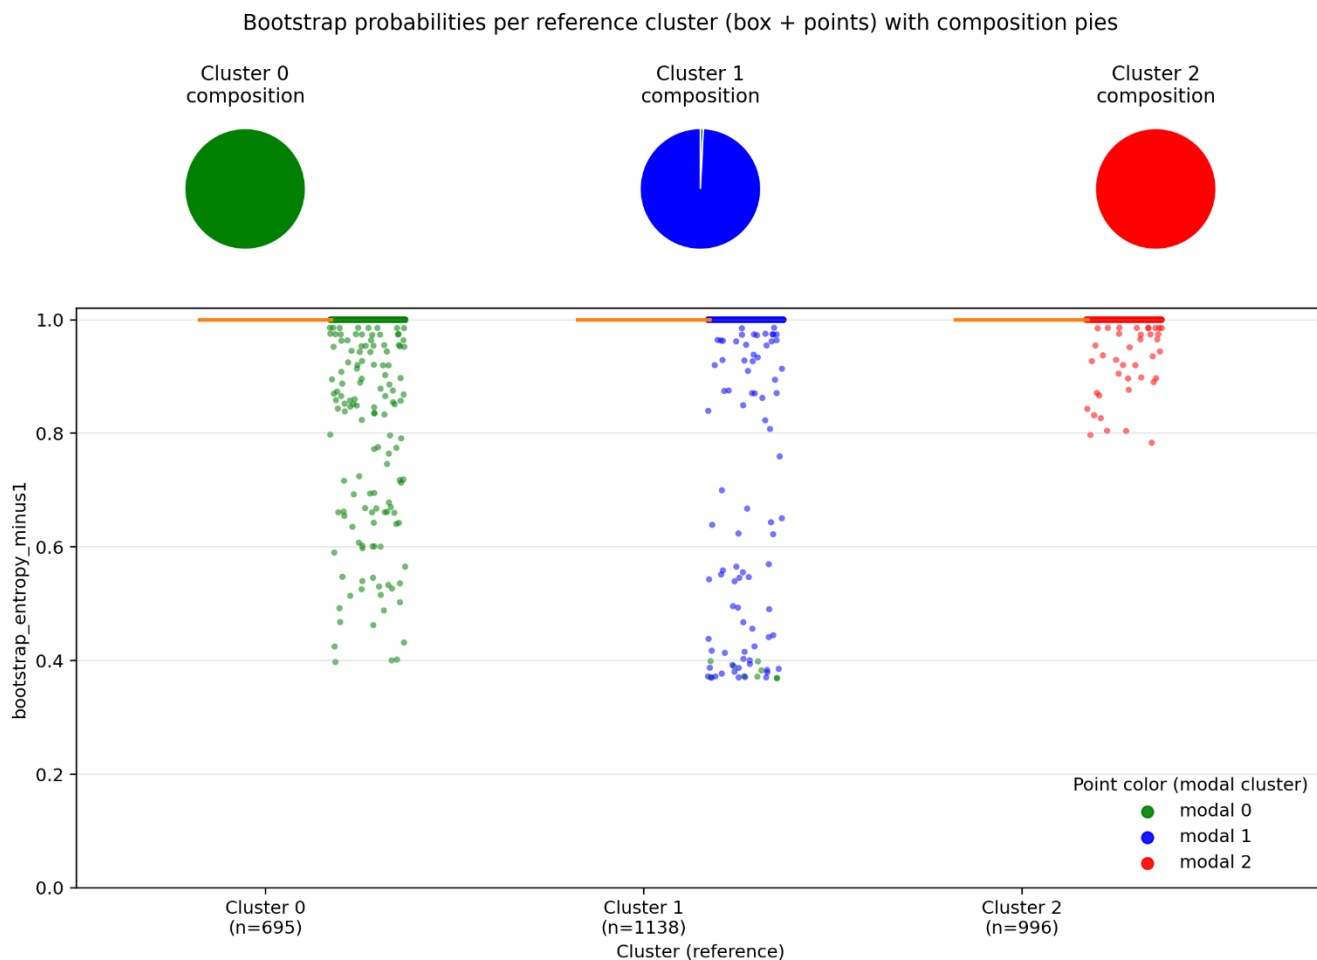

**Figure 2: Bootstrapping results of the testing clustering run. It can be seen, that cluster 2 (anthropogenic cluster; red) is still very stable across the bootstrapping, despite having 4 samples removed.**

The “testing” clustering run was used to determine the anthropogenic contribution to samples S6, S21, S22, and S38 (the ones that have been excluded). The individual contributions can be seen in Figure S3. Upon comparison with the original clustering with all samples included in the clustering run, it is evident that despite the clustering having never seen the actual samples (S6, S21, S22, and S38), the calculated contributions are strikingly similar to the ones shown in the manuscript. This shows the applicability of the presented clustering approach for new and unknown samples.



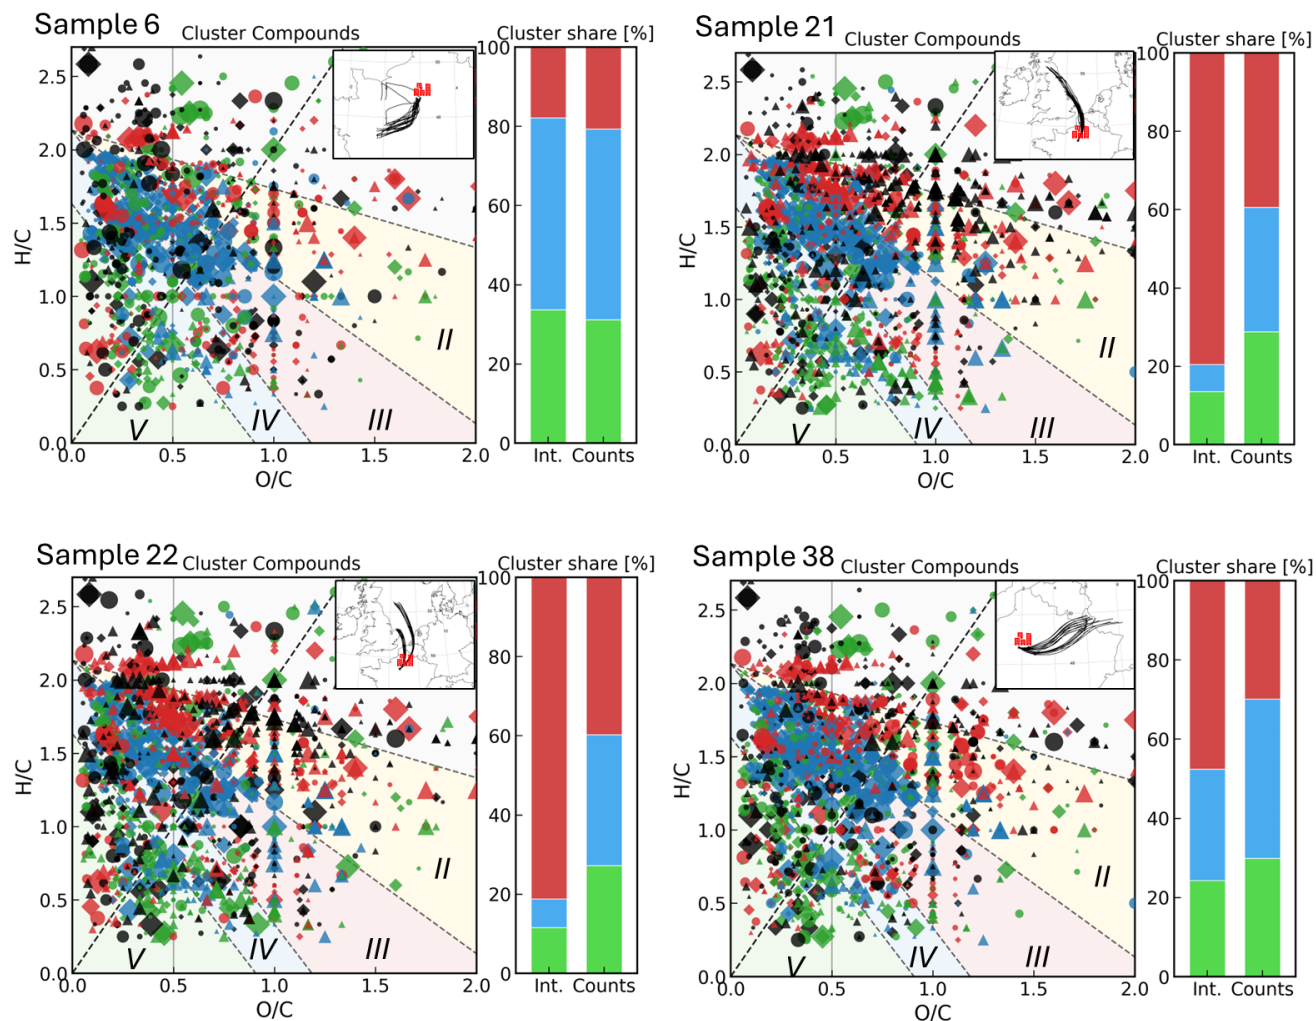

**Figure S3: Van Krevelen plots of the 4 individual samples that have been excluded in the testing clustering attempt. The clustering algorithm has therefore never seen the presented samples, still giving strikingly similar results to the ones presented in the manuscript, which shows the applicability of the presented clustering method for new and unknown samples.**
